# Supplementary material for: Age- and Diet-Dependent Changes in Hepatic Lipidomic Profiles of Phospholipids in Male Mice: Age Acceleration in Cyp2b-Null Mice
Source: J Lipids. 2022 Mar 29;2022:7122738. doi: 10.1155/2022/7122738 (PMC8983274; doi:10.1155/2022/7122738)
Supplement: Supplementary Materials — Supplementary File 1 Lipidomic data from all treatment groups. Seventy-seven lipid species were identified from liver samples of male mice by LC-MS/MS from arachidonic (ARA), linoleic (LA), α-linolenic (ALA), and docosahexaenoic acid (DHA). Treatment groups are ND-fed young (4.5 mo), ND-fed old (9 mo), and young mice fed a HFD for 10 weeks. All data is in peak area. Supplementary File 2 Data used to make Figure 4 principal component analysis (PCA) biplot. Supplementary File 3 (a) Lipids that are statistically different by Student's t-tests between Cyp2b-null and WT mice in the different age and diet groups. (b) Important or significantly perturbed phospholipid species in Cyp2b-null mice compared to WT mice identified by random forest analysis and Student's t-tests in young (4.5 mo) ND-fed, young (4.5 mo) HFD-fed, and old (9 mo) mice. Supplementary File 4 Important perturbed hepatic phospholipid species in Cyp2b-null mice within each group. Venn diagram of important lipid species between Cyp2b-null and WT mice of each featured group based on random forest analysis (MDA>0). Supplementary File 5 (a) Data used to make principal component analysis (PCA) biplot for Figure 5(b). (b) PCA contribution graph below containing the top 10 contributing variables of the PCA plot based on loading strength expressed in percent contribution. The factoextra R package (https://cran.r-project.org) was used to obtain the percent contributions of each measured variable in principle components 1-3. [file 7122738.f1.xlsx]

## Sheet: Suppl File 1
Supplementary File 1. Lipidomic data from all treatment groups. Seventy-seven lipid species were identified from liver samples of male mice by LC-MS/MS from arachidonic (ARA), linoleic (LA), α-linolenic (ALA) and docosahexaenoic acid (DHA). Treatment groups are ND-fed young (4.5 mo), ND-fed old (9 mo), and young mice fed a HFD for 10 weeks. All data is in peak area.
Phospholipid Species
Abbreviated Nomenclature	Standard Nomenclature	Cyp2b-null Young	Cyp2b-null Young	Cyp2b-null Young	BL6 Young	BL6 Young	BL6 Young	HFD Cyp2b-null	HFD Cyp2b-null	HFD Cyp2b-null	HFD BL6	HFD BL6	HFD BL6	Old Cyp2b-null	Old Cyp2b-null	Old Cyp2b-null	Old Cyp2b-null	Old Cyp2b-null	Old BL6	Old BL6	Old BL6	Old BL6	Old BL6
LA	(18:2)	34623	37429	83565	104020	185780	100440	154840	114570	69520	107310	236910	86558	112960	245980	93114	83905	187050	362330	354890	369290	136140	266900
LA_LysoPtdEtn(18:2)	(18:2 LPE)	8716.98	10286	21543	59705	144880	50415	27814	9804.35	29740	12667	44159	15000	63239	67140	42364	105900	23114	121950	225260	165790	83162	113290
LA_LysoPtdCho(18:2)	(18:2 LPC)	43906	41755	46130	202090	325530	261680	116950	66109	137040	103460	116110	106650	410520	263260	177180	250670	154140	473620	506710	544740	256840	481640
LA_PtdIns(3,4,5)P3(38:2)	(20:0-18:2 PIP3)	0	0	0	13636	27150	19390	8813.95	6217.39	11780	8500	10909	9488.37	30957	37302	16273	40286	14364	44974	75895	52079	30108	80595
LA_Ptd2Gro(64:5)	(46:3-18:2 CL)	0	0	0	9636.36	14700	11341	0	0	0	0	0	0	13152	0	19045	0	15977	21846	17763	21868	19189	19286
LA_PtdEtn(32:2)/PtdCho(30:2)-CH3	(14:0-18:2 PE)/(12:0-18:2 PC)	0	0	0	0	11000	0	0	0	0	0	0	0	9108.7	10395	0	10952	8545.45	18795	11842	11316	0	12214
LA_PtdOH(36:4)	(18:2-18:2 PA)	48623	44408	136850	148910	282430	236390	207770	150150	114160	123980	117500	128280	192220	215860	262820	225170	204910	392820	419130	228180	293380	251500
LA_Ptd2Gro(70:8)	(52:6-18:2 CL)	16075	12714	68935	80727	167550	72927	58814	30783	41660	37104	44886	34326	119200	86651	168800	129380	64045	154230	129240	112000	173860	107600
LA_Ptd2Gro(70:3)/PtdEtn(34:2)/PtdCho(32:2)-CH3	(52:1-18:2 CL)/(16:0-18:2 PE)/(14:0-18:2 PC)	52434	55898	95826	130000	142900	222660	67140	43652	80820	80167	131500	153580	63587	133650	122450	67238	70386	208360	332790	215370	130240	120450
LA_PtdOH(38:5)/Ptd2Gro(72:9)	(20:3-18:2 PA)/(54:7-18:2 CL)	0	0	0	0	0	0	0	0	0	0	0	0	18978	0	0	17976	12659	0	0	12947	0	0
LA_PtdOH(38:4)/Ptd2Gro(72:7)	(20:2-18:2 PA)/(54:5-18:2 CL)	5471.7	0	13022	13409	21750	16902	14744	12826	9340	11042	11750	10814	0	19814	15591	0	0	0	29921	0	24757	0
LA_PtdOH(38:2)	(20:0-18:2 PA)	0	4326.53	0	0	21200	0	0	0	0	0	0	0	39087	13116	18091	26929	26114	47462	49553	21053	25595	43786
LA_PtdSer(32:2)	(14:0-18:2 PS)	3301.89	0	8608.7	9386.36	0	15293	8581.4	4413.04	8160	6291.67	15500	9953.49	0	0	0	0	0	0	0	0	0	0
LA_PtdCho(34:4)-CH3/PtdEtn(36:4)	(16:2-18:2 PC)/(18:2-18:2 PE)	0	0	0	0	0	0	0	0	0	0	0	0	9304.35	0	9886.36	0	0	17974	0	0	27405	0
LA_PtdCho(34:2)-CH3/PtdEtn(36:2)	(16:0-18:2 PC)/(18:0-18:2 PE)	283340	312570	741460	871550	966400	1063300	756440	427110	574640	583750	857840	602070	466430	503370	847340	453400	487230	474590	542920	444450	622840	488520
LA_PtdOH(40:4)	(22:2-18:2 PA)	8245.28	8653.06	22870	27409	53275	35976	36349	22478	17860	15396	21955	20791	41478	38186	46841	38286	28227	44026	47579	58105	77757	54833
LA_PtdSer(34:2)	(16:0-18:2 PS)	5358.49	6387.76	14804	14636	33500	20268	16953	9543.48	11580	10583	18250	11209	16761	12721	19909	13238	10545	22897	30105	12158	27730	18952
LA_PtdCho(36:2)-CH3/PtdGro(36:3)	(18:0-18:2 PC)/(18:1-18:2 PG)	80491	90408	225760	317860	518030	327000	289300	181910	222140	182150	233340	157910	703850	661530	555300	749740	679640	721740	866790	666760	706620	724790
LA_PtdSer(36:3)	(18:1-18:2 PS)	0	0	0	0	0	0	0	7891.3	0	0	0	0	10543	7906.98	0	9142.86	0	19564	23368	14895	16297	23786
LA_PtdEtn(40:6)/PtdCho(38:6)-CH3	(22:4-18:2 PE)/(20:4-18:2 PC)	6622.64	8346.94	13370	12477	0	11585	13302	6847.83	12320	11292	14000	13326	0	0	0	0	0	0	10237	0	0	9190.48
LA_PtdGro(38:4)/Ptd2Gro(84:19)	(20:2-18:2 PG)/(66:17-18:2 CL)	0	0	0	11818	18450	0	0	0	0	0	0	0	0	0	13909	11905	8250	22769	0	0	0	0
LA_PtdGro(38:3)/Ptd2Gro(84:17)	(20:1-18:2 PG)/(66:15-18:2 CL)	0	0	0	0	0	0	0	0	0	0	0	0	10500	8651.16	0	0	0	0	39211	24474	22568	26548
LA_PtdIns(32:3)/Ptd2Gro(84:13)	(14:1-18:2 PI)/(66:11-18:2 CL)	5113.21	5938.78	19696	18273	34875	28439	20791	9913.04	15000	12021	18136	12837	12739	10512	23614	7928.57	11818	10462	11079	7894.74	16649	9023.81
LA_PtdCho(40:6)-CH3/PtdEtn(42:6)	(22:4-18:2 PC)/(24:4-18:2 PE)	0	0	0	0	0	0	0	0	0	0	0	0	0	66442	0	0	0	96282	31289	64947	0	0
LA_PtdIns(34:3)/Ptd2Gro(88:13)	(16:1-18:2 PI)/(70:11-18:2 CL)	3056.6	3367.35	0	8886.36	19525	0	8162.79	4956.52	0	0	0	0	28739	23349	17545	37738	14273	20872	26789	26368	29135	19214
ARA	(20:4)	71592	82919	36154	28366	43846	45182	39262	32911	31955	25283	23932	23453	121830	52385	40744	45024	45333	119220	36514	46167	61865	58657
ARA_LysoPtdOH(20:4)	(20:4 LPA)	37918	43486	46615	36537	41897	49568	51786	35111	46159	32543	27955	13813	72667	78256	57718	40073	49556	61528	54657	46639	39432	37543
ARA_LysoPtdEtn(20:4)	(20:4 LPE)	168690	202760	55462	90098	116950	172570	69881	33000	71977	89413	69250	37016	248690	235360	74974	199490	112640	185640	507490	378890	275300	263570
ARA_LysoPtdCho(20:4)	(20:4 LPC)	137730	115810	54179	55293	56154	50886	52786	28533	44545	23239	38500	17891	128360	196050	85000	156020	89806	251140	172000	171690	151320	78229
ARA_PtdIns(3,4,5)P3(42:6)	(22:2-20:4 PIP3)	17816	0	0	0	12641	14295	0	0	0	0	0	0	36889	74692	0	22854	11694	57528	12000	29806	15027	28314
ARA_PtdOH(36:4)	(16:0-20:4 PA)	15204	15216	16821	14707	14538	14636	15810	0	12205	0	0	0	19944	28462	25205	24171	24639	20833	25286	18278	11189	22829
ARA_PtdOH(38:4)/Ptd2Gro(72:8)	(18:0-20:4 PA)/(52:4-20:4 CL)	150510	187730	180770	125200	124850	93341	96071	73689	116180	63543	72909	50219	230220	165590	176510	168100	143810	190190	178800	170190	231240	177200
ARA_PtdEtn(36:4)	(16:0-20:4 PE)	158630	197620	189870	244340	156030	223680	174980	130580	213700	124870	171590	127580	300140	134560	292380	246120	169560	242390	256370	180440	321620	141000
ARA_PtdEtn(37:5)/PtdOH(40:4)	(17:1-20:4 PE)/(20:0-20:4 PA)	53408	161380	97974	33707	86205	44682	91024	47533	74932	27674	50750	16344	60278	68462	51051	85244	33444	93639	108690	66333	59216	61400
ARA_PtdCho(36:4)-CH3/Ptd2Gro(78:7)	(16:0-20:4 PC)/(58:3-20:4 CL)	784160	1053800	1165500	972070	872380	814480	1140000	1023900	1044300	877930	926140	494110	1030800	680540	817080	931930	726640	894470	874290	921000	939570	875540
ARA_PtdSer(36:4)	(16:0-20:4 PS)	34041	62108	39205	25439	40154	36000	42762	25089	29500	18500	24591	12719	44611	29308	28692	29927	23250	30056	52371	32806	44108	47200
ARA_PtdCho(38:4)-CH3/Ptd2Gro(84:21)	(18:0-20:4 PC)/(64:17-20:4 CL)	540710	559380	548690	238800	344380	263950	366760	208130	344660	147980	152230	56719	234810	590740	446870	458660	609810	311890	247660	346250	325240	321540
ARA_PtdSer(38:4)/Ptd2Gro(84:5)	(18:0-20:4 PS)/(64:1-20:4 CL)	38306	45784	49077	24683	34615	25364	0	0	26841	14913	10705	5468.75	60278	56692	55615	51463	43694	32111	62371	44556	34189	32400
ARA_PtdCho(40:4)-CH3	(20:0-20:4 PC)	0	0	0	0	0	0	0	0	0	0	0	0	14472	9051.28	10128	0	0	15444	17114	16500	16919	15429
ARA_PtdIns(34:4)/Ptd2Gro(88:17)	(14:0-20:4 PI)/(68:13-20:4 CL)	9367.35	27216	17795	13707	12282	10159	13190	0	16545	11761	0	0	0	8769.23	13590	0	9972.22	0	0	0	0	0
ARA_PtdIns(36:4)	(16:0-20:4 PI)	0	0	23051	13390	0	0	0	0	0	0	0	0	32333	10231	16385	27805	22333	19889	14857	26444	12568	20829
ARA_PtdIns(38:4)	(18:0-20:4 PI)	0	0	31410	28854	31333	17000	33405	29533	36409	25217	17000	16734	69111	41769	48026	49439	25111	16611	16800	39389	68162	45714
DHA	(22:6)	17014	14589	15090	19881	22135	17497	12773	11820	17923	14851	14217	10970	15017	16215	14176	11632	16780	19380	16280	13980	22069	11678
DHA_LysoPtdOH(22:6)	(22:6 LPA)	646.259	0	0	0	0	0	0	0	0	0	0	0	0	0	0	0	0	0	0	0	0	0
DHA_LysoPtdEtn(22:6)	(22:6 LPE)	10707	4668.71	3771.08	6107.14	16526	8298.14	2185.57	1335	3628.42	4141.89	3769.23	3111.11	19909	13692	11019	6940.17	7917.43	15090	26548	31584	32874	2049.59
DHA_LysoPtdCho(22:6)	(22:6 LPC)	5857.14	7521.47	5542.17	7583.33	7025.64	6472.05	3335.05	3595	4617.49	3925.68	6307.69	3400	10248	8616.82	5361.11	16410	7770.64	9590	14914	19901	15724	4289.26
DHA_PtdOH(38:6)	(16:0-22:6 PA)	5047.62	4429.45	4945.78	3684.52	5596.15	4869.57	2268.04	1890	2054.64	2412.16	3090.91	2229.63	8305.79	10636	11759	8564.1	10018	11440	11710	9673.27	10080	7388.43
DHA_PtdOH(40:6)	(18:0-22:6 PA)	16959	16448	16331	12524	20141	16124	8335.05	6685	8103.83	13270	13301	9296.3	29198	29822	44306	38940	29037	32640	31613	27109	39460	19066
DHA_PtdEtn(38:6)/Ptd2Gro(78:11)	(16:0-22:6 PE)/(56:5-22:6 CL)	142650	87994	86464	67036	72237	117570	41979	53270	108230	133340	193130	134410	294020	229300	175330	205680	224840	225180	260990	326550	118330	174740
DHA_PtdOH(42:6)/PtdSer(36:7)	(20:0-22:6 PA)/(14:1-22:6 PS)	13143	9184.05	8734.94	6375	13423	7658.39	5969.07	4280	10798	9702.7	11462	8503.7	20876	15280	18204	21282	11229	18620	21538	17356	15402	8661.16
DHA_PtdCho(38:6)-CH3/PtdEtn(40:6)/PtdOh(44:12)	(16:0-22:6 PC)/(18:0-22:6 PE)/(22:6-22:6 PA)	117500	149460	147800	122400	121800	132070	81351	89475	144070	174570	179170	143990	138220	132110	193190	182560	143860	139110	167330	209260	208480	161680
DHA_Ptd2Gro(84:13)	(62:7-22:6 CL)	0	0	0	0	0	0	0	0	0	0	0	0	14917	5317.76	0	0	4513.76	4740	19398	8069.31	7908.05	0
DHA_PtdSer(38:6)/Ptd2Gro(84:11)	(16:0-22:6 PS)/(62:5-22:6 CL)	6258.5	8055.21	7192.77	5517.86	7288.46	8739.13	5407.22	4980	5267.76	7986.49	5510.49	3407.41	0	0	8935.19	9324.79	0	3990	0	0	0	5933.88
DHA_Ptd2Gro(84:8)	(62:2-22:6 CL)	0	0	0	0	0	0	0	0	0	0	0	0	0	1130.84	0	0	1256.88	0	0	1673.27	2333.33	0
DHA_Ptd2Gro(86:16)	(64:10-22:6 CL)	1285.71	0	0	0	0	0	0	0	0	0	0	0	0	0	0	0	0	0	0	0	0	0
DHA_PtdCho(40:6)-CH3/PtdEtn(42:6)	(18:0-22:6 PC)/(20:0-22:6 PE)	55422	46865	72024	47643	57212	31503	22521	32990	49781	33919	44748	32504	41017	61514	56704	40846	37303	61720	59699	62287	73092	43479
DHA_PtdSer(40:6)/Ptd2Gro(88:9)	(18:0-22:6 PS)/(66:3-22:6 CL)	6612.24	4509.2	4036.14	2035.71	6730.77	4434.78	1134.02	920	1967.21	1993.24	2762.24	2459.26	9652.89	8663.55	8314.81	12385	10330	10050	10086	12564	7689.66	3297.52
DHA_PtdEtn(44:10)	(22:4-22:6 PE)	0	0	0	0	3769.23	0	0	0	0	0	0	0	4966.94	0	0	0	0	0	0	10307	4137.93	0
DHA_PtdEtn(44:8)	(22:2-22:6 PE)	0	7993.86	4632.53	3136.9	0	0	0	2705	4715.85	2263.51	0	3718.52	0	10402	4305.56	3196.58	6155.96	11540	14344	0	3620.69	0
DHA_PtdCho(42:6)-CH3	(20:0-22:6 PC)	632.653	0	0	0	2403.85	0	0	0	0	0	0	0	0	0	0	0	0	0	2946.24	0	2862.07	0
DHA_PtdGro(42:6)	(20:0-22:6 PG)	2435.37	3625.77	2445.78	1708.33	2121.79	2006.21	1432.99	1310	2256.83	2263.51	2552.45	1851.85	0	2803.74	5185.19	3427.35	2302.75	2580	2096.77	3198.02	2057.47	2933.88
DHA_PtdIns(37:7)	(15:1-22:6 PI)	3489.8	18160	0	0	12468	14820	1283.51	2375	0	5020.27	6090.91	2192.59	36025	22888	7407.41	28265	28633	62610	80161	49604	70218	0
DHA_PtdIns(37:6)	(15:0-22:6 PI)	0	0	6451.81	4726.19	0	0	0	0	8371.58	0	0	0	0	0	0	0	0	0	0	0	0	0
DHA_PtdGro(44:10)	(22:4-22:6 PG)	0	0	0	0	0	0	0	0	0	0	0	0	0	0	0	0	0	0	0	0	1229.89	0
DHA_PtdIns(38:6)	(16:0-22:6 PI)	2387.76	0	3530.12	0	0	0	0	0	0	0	0	0	0	0	0	0	0	0	0	0	0	0
DHA_PtdIns(41:6)	(19:0-22:6 PI)	4306.12	2171.78	0	3369.05	0	2180.12	1257.73	1825	2464.48	3736.49	2573.43	3111.11	3925.62	7140.19	5666.67	7615.38	5036.7	4480	4021.51	4207.92	2850.57	3413.22
ALA	(18:3)	46811	45583	54226	54481	56252	52277	43551	39741	46000	40312	83523	36533	72041	70280	51750	43159	47438	40756	63641	84912	59056	67632
ALA_LysoPtdEtn(18:3)	(18:3 LPE)	9015.79	8788.89	12780	28788	17252	23837	4359.55	4740.54	4256.54	7247.06	8887.18	9719.63	9262.3	9330.51	8075	5253.97	6820.31	8708.66	14305	19656	13333	14886
ALA_LysoPtdCho(18:3)	(18:3 LPC)	7310.53	11861	14305	26889	27000	33228	7488.76	6151.35	6141.36	7088.24	8174.36	11981	7598.36	8881.36	9341.67	8285.71	7984.38	7472.44	11172	12408	11040	10623
ALA_PtdIns(3,4,5)P3(40:3)	(22:0-18:3 PIP3)	5857.89	6544.44	7878.05	9846.56	7393.55	7190.22	4337.08	3621.62	6926.7	3994.12	10856	3827.1	10393	8203.39	5741.67	5277.78	5734.38	5889.76	8898.44	10856	6761.9	9473.68
ALA_PtdOH(36:5)	(18:2-18:3 PA)	20358	26006	29921	17116	44910	24033	16500	18978	13309	21600	20538	16720	33549	35076	39233	31246	28883	35173	37133	39712	39706	48184
ALA_PtdEtn(34:3)	(16:0-18:3 PE)	10721	13928	17293	11201	7670.97	8875	6269.66	7572.97	3811.52	7364.71	8123.08	8588.78	23754	47237	31817	13802	16563	33126	42641	32800	46897	35377
ALA_PtdEtn(36:5)	(18:2-18:3 PE)	12305	6027.78	20598	12069	10387	13522	0	0	0	2194.12	2917.95	0	0	0	0	0	0	0	0	0	0	0
ALA_PtdCho(34:3)	(16:0-18:3 PC)	13442	25250	20372	8810.98	18510	12310	29522	29341	19209	26876	35482	24659	55672	108700	79675	49524	57977	78055	94625	67280	74151	89219
ALA_PtdEtn(36:3)/PtdCho(36:5)	(18:0-18:3 PE)/(18:2-18:3 PC)	7073.68	5555.56	6000	6592.59	11110	0	4421.35	2210.81	1738.22	3711.76	3994.87	3355.14	3090.16	5855.93	3633.33	6793.65	2257.81	13102	21078	4440	8428.57	19360
ALA_PtdCho(36:3)	(18:0-18:3 PC)	13774	27978	34220	9703.7	32071	23712	11399	14903	4403.14	13165	24600	11411	41189	67119	50667	25643	35469	49220	81656	56456	50770	65289
ALA_PtdGro(40:9)/Ptd2Gro(86:14)	(22:6-18:3 PG)/(68:11-18:3 CL)	11821	13672	17506	11713	29781	10147	8769.66	10697	4539.27	9482.35	17713	7219.63	14328	34983	21325	14405	12969	32874	34375	30504	21222	45193
	PC	655308	711071	836235	580693	922683	635711	702388	439264	595680	378157	451162	254106	1049993	1.43714e+06	1.15158e+06	1.29289e+06	1382896	1180339	1.31079e+06	1153246	1.17656e+06	1.2222e+06
	PE	377714	474944	416832	371490	336299	408329	314253	241661	405389	297706	426511	290641	683159	489961	554884	554043	450563	605875	683035	616430	553822	412517
	Ratio	1.73493	1.49717	2.00617	1.56314	2.74364	1.55686	2.23511	1.81769	1.4694	1.27024	1.0578	0.874296	1.53697	2.93317	2.07535	2.33356	3.06926	1.94816	1.91907	1.87085	2.12444	2.96279
	ratio 34:3	1.2538	1.81289	1.17805	0.786624	2.41299	1.38704	4.70871	3.87444	5.03972	3.6493	4.36805	2.87107	2.34369	2.30116	2.50416	3.58818	3.50039	2.35631	2.21911	2.05122	1.58115	2.52195
	lyso total	430498	446937	260327	513090	753215	656954	336586	188379	348105	283725	323112	218582	970494	880587	471033	789043	459749	1.13474e+06	1533056	1391298	879025	1.00612e+06
	n-6	2.82346e+06	3.3977e+06	4.06501e+06	3.99962e+06	4977180	4369799	3.99448e+06	2.77718e+06	3465668	2.78858e+06	3478297	2.24486e+06	5.07879e+06	4.88675e+06	4.71004e+06	4.8161e+06	4.16258e+06	5840142	6419631	5.61006e+06	5327237	5.09951e+06
	n-3	570844	576870	624091	510939	633215	583374	327850	357412	484585	556431	713495	499170	917175	971198	871123	800458	769080	937137	1.1532e+06	1.16635e+06	971784	853847
	n-3:n-6 ratio	4.94612	5.88988	6.51349	7.82798	7.86017	7.49057	12.1839	7.77025	7.15183	5.01154	4.87501	4.49719	5.53742	5.03168	5.40686	6.01668	5.41241	6.2319	5.5668	4.80994	5.48191	5.9724
	Total LA	605379	642488	1.51244e+06	2.05443e+06	2988925	2494006	1.80677e+06	1.10917e+06	1355760	1.30571e+06	1892745	1.37279e+06	2.37335e+06	2.42584e+06	2.47007e+06	2.27978e+06	2.02129e+06	3297563	3782361	3.07468e+06	2720272	2.87212e+06
	Total ARA	2.21808e+06	2755209	2552573	1945191	1988255	1875793	2187717	1668009	2109908	1482866	1585552	872067	2705433	2.46092e+06	2239968	2536320	2.14129e+06	2542579	2637270	2535378	2606965	2227394
	Total DHA	412354	385676	388992	313728	370878	374242	191232	219455	374250	413396	488685	365155	646298	575532	569864	597068	546984	632760	743676	807324	640419	448610
	Total ALA	158490	191195	235099	197211	262338	209131	136618	137957	110335	143035	224809	134014	270877	395666	301259	203390	222096	304377	409524	359024	331365	405237
	Total	3.39431e+06	3.97457e+06	4.6891e+06	4.51056e+06	5.6104e+06	4.95317e+06	4.32233e+06	3.1346e+06	3.95025e+06	3.34501e+06	4.19179e+06	2.74403e+06	5.99596e+06	5.85795e+06	5.58116e+06	5.61656e+06	4.93166e+06	6.77728e+06	7.57283e+06	6.77641e+06	6.29902e+06	5.95336e+06
	All ratios
	PC	0.193061	0.178905	0.178336	0.128741	0.16446	0.128344	0.162502	0.140134	0.150795	0.113051	0.10763	0.0926034	0.175117	0.245332	0.206332	0.230193	0.280412	0.174161	0.173091	0.170185	0.186785	0.205296
	PE	0.111279	0.119496	0.0888936	0.0823601	0.0599422	0.0824379	0.0727044	0.0770948	0.102624	0.0890001	0.101749	0.105918	0.113937	0.0836403	0.0994208	0.0986444	0.0913613	0.089398	0.0901955	0.090967	0.0879219	0.0692915
	Ratio
	ratio 34:3
	lyso total	0.126829	0.112449	0.0555175	0.113753	0.134253	0.132633	0.0778714	0.0600968	0.0881222	0.0848203	0.0770822	0.0796572	0.161858	0.150323	0.0843969	0.140485	0.0932239	0.167433	0.202442	0.205315	0.139549	0.169
	n-6	0.831823	0.85486	0.866906	0.886724	0.887135	0.882222	0.92415	0.885978	0.877328	0.833653	0.829788	0.818089	0.847035	0.834209	0.843917	0.857483	0.844052	0.861724	0.847719	0.827881	0.845725	0.856577
	n-3	0.168177	0.14514	0.133094	0.113276	0.112865	0.117778	0.0758503	0.114022	0.122672	0.166347	0.170212	0.181911	0.152965	0.165791	0.156083	0.142517	0.155948	0.138276	0.152281	0.172119	0.154275	0.143423
	n-3:n-6 ratio
	Total LA	0.178351	0.16165	0.322543	0.455471	0.532748	0.503517	0.418007	0.353849	0.343208	0.390347	0.451536	0.500284	0.395825	0.41411	0.442573	0.405904	0.409859	0.486562	0.499465	0.453734	0.431856	0.482437
	Total ARA	0.653472	0.69321	0.544363	0.431253	0.354388	0.378705	0.506143	0.532129	0.53412	0.443307	0.378252	0.317805	0.451209	0.420099	0.401344	0.451579	0.434193	0.375162	0.348254	0.374148	0.413868	0.374141
	Total DHA	0.121484	0.0970358	0.0829566	0.0695541	0.0661055	0.0755561	0.0442428	0.0700106	0.0947408	0.123586	0.116581	0.133073	0.107789	0.098248	0.102105	0.106305	0.110913	0.0933649	0.0982031	0.119137	0.10167	0.0753541
	Total ALA	0.0466929	0.0481045	0.0501373	0.043722	0.0467592	0.0422217	0.0316075	0.0440112	0.0279311	0.0427608	0.0536309	0.0488385	0.0451765	0.0675434	0.0539778	0.0362126	0.0450347	0.0449114	0.0540781	0.0529814	0.0526059	0.0680686
	Total	1	1	1	1	1	1	1	1	1	1	1	1	1	1	1	1	1	1	1	1	1	1
	LA/Total	0.0102003	0.00941713	0.0178211	0.0230614	0.0331135	0.0202779	0.0358233	0.0365502	0.0175989	0.0320806	0.0565176	0.0315441	0.0188393	0.0419908	0.0166836	0.0149389	0.0379284	0.0534625	0.0468636	0.0544964	0.0216129	0.0448318
	ARA/Total	0.0210918	0.0208624	0.00771022	0.0062888	0.00781514	0.00912183	0.00908352	0.0104993	0.00808936	0.00755842	0.00570925	0.00854692	0.0203187	0.00894255	0.00730027	0.00801629	0.00919224	0.0175911	0.00482171	0.0068129	0.00982137	0.00985276
	DHA/Total	0.00501251	0.00367059	0.0032181	0.00440766	0.00394535	0.00353248	0.00295512	0.00377082	0.00453718	0.00443975	0.00339163	0.00399777	0.00250452	0.00276803	0.00253997	0.00207102	0.00340251	0.00285955	0.00214979	0.00206304	0.00350356	0.00196158
	ALA/Total	0.013791	0.0114687	0.0115643	0.0120785	0.0100264	0.0105542	0.0100758	0.0126782	0.0116448	0.0120514	0.0199254	0.0133136	0.0120149	0.0119974	0.00927226	0.00768424	0.00961907	0.00601362	0.00840386	0.0125305	0.00937542	0.0113603
	Greater than 4 double bonds	7.66929e+06	7.7116e+06	1.56393e+07	1.55089e+07	2.8129e+07	1.90558e+07	1.64398e+07	11969856	1.07198e+07	1.0949e+07	1.18019e+07	1.01814e+07	2.09431e+07	2.34139e+07	2.65245e+07	2.23365e+07	1.74459e+07	35817407	3.32563e+07	2.57449e+07	3.0229e+07	2.34757e+07
	Greater than 4 double bonds / total	2.25946	1.94024	3.33525	3.43836	5.01373	3.84719	3.80345	3.81863	2.71369	3.27323	2.81548	3.71038	3.49286	3.99695	4.7525	3.97689	3.53754	5.28492	4.39153	3.79919	4.79899	3.94327

## Sheet: Suppl File 2
Supplementary File 2. Data used to make Figure 4 principal component analysis (PCA) biplot.
Group	TAG	CHOL	LDL	VLDL	HDL	WSI	Weight	LA	LA_LysoPtdEtn(18:2)	LA_LysoPtdCho(18:2)	LA_PtdIns(3,4,5)P3(38:2)	LA_Ptd2Gro(64:5)	LA_PtdEtn(32:2)/PtdCho(30:2)-CH3	LA_PtdOH(36:4)	LA_Ptd2Gro(70:8)	LA_Ptd2Gro(70:3)/PtdEtn(34:2)/PtdCho(32:2)-CH3	LA_PtdOH(38:5)/Ptd2Gro(72:9)	LA_PtdOH(38:4)/Ptd2Gro(72:7)	LA_PtdOH(38:2)	LA_PtdSer(32:2)	LA_PtdCho(34:4)-CH3/PtdEtn(36:4)	LA_PtdCho(34:2)-CH3/PtdEtn(36:2)	LA_PtdOH(40:4)	LA_PtdSer(34:2)	LA_PtdCho(36:2)-CH3/PtdGro(36:3)	LA_PtdSer(36:3)	LA_PtdEtn(40:6)/PtdCho(38:6)-CH3	LA_PtdGro(38:4)/Ptd2Gro(84:19)	LA_PtdGro(38:3)/Ptd2Gro(84:17)	LA_PtdIns(32:3)/Ptd2Gro(84:13)	LA_PtdCho(40:6)-CH3/PtdEtn(42:6)	LA_PtdIns(34:3)/Ptd2Gro(88:13)	ARA	ARA_LysoPtdOH(20:4)	ARA_LysoPtdEtn(20:4)	ARA_LysoPtdCho(20:4)	ARA_PtdIns(3,4,5)P3(42:6)	ARA_PtdOH(36:4)	ARA_PtdOH(38:4)/Ptd2Gro(72:8)	ARA_PtdEtn(36:4)	ARA_PtdEtn(37:5)/PtdOH(40:4)	ARA_PtdCho(36:4)-CH3/Ptd2Gro(78:7)	ARA_PtdSer(36:4)	ARA_PtdCho(38:4)-CH3/Ptd2Gro(84:21)	ARA_PtdSer(38:4)/Ptd2Gro(84:5)	ARA_PtdCho(40:4)-CH3	ARA_PtdIns(34:4)/Ptd2Gro(88:17)	ARA_PtdIns(36:4)	ARA_PtdIns(38:4)
Young_Cyp2b-null	73	135	19.2	14.5	122.8	0.027056	27.72	34623	8716.98	43906	1	1	1	48623	16075	52434	1	5471.7	1	3301.89	1	283340	8245.28	5358.49	80491	1	6622.64	1	1	5113.21	1	3056.6	71592	37918	168690	137730	17816	15204	150510	158630	53408	784160	34041	540710	38306	1	9367.35	1	1
Young_Cyp2b-null	67	130	18	13.5	124.2	0.038476	26.77	37429	10286	41755	1	1	1	44408	12714	55898	1	1	4326.53	1	1	312570	8653.06	6387.76	90408	1	8346.94	1	1	5938.78	1	3367.35	82919	43486	202760	115810	1	15216	187730	197620	161380	1053800	62108	559380	45784	1	27216	1	1
Young_Cyp2b-null	59	117	16.8	11.7	112.1	0.024701	25.1	83565	21543	46130	1	1	1	136850	68935	95826	1	13022	1	8608.7	1	741460	22870	14804	225760	1	13370	1	1	19696	1	1	36154	46615	55462	54179	1	16821	180770	189870	97974	1165500	39205	548690	49077	1	17795	23051	31410
Young_WT	101	102	10.8	20.2	92.5	0.02011	27.35	104020	59705	202090	13636	9636.36	1	148910	80727	130000	1	13409	1	9386.36	1	871550	27409	14636	317860	1	12477	11818	1	18273	1	8886.36	28366	36537	90098	55293	1	14707	125200	244340	33707	972070	25439	238800	24683	1	13707	13390	28854
Young_WT	98	100	9.4	19.6	91.5	0.013823	27.49	185780	144880	325530	27150	14700	11000	282430	167550	142900	1	21750	21200	1	1	966400	53275	33500	518030	1	1	18450	1	34875	1	19525	43846	41897	116950	56154	12641	14538	124850	156030	86205	872380	40154	344380	34615	1	12282	1	31333
Young_WT	69	109	12.9	13.7	101.1	0.026427	28.38	100440	50415	261680	19390	11341	1	236390	72927	222660	1	16902	1	15293	1	1063300	35976	20268	327000	1	11585	1	1	28439	1	1	45182	49568	172570	50886	14295	14636	93341	223680	44682	814480	36000	263950	25364	1	10159	1	17000
HFD_Cyp2b-null	49	189	34.6	9.9	165.1	0.075243	32.96	154840	27814	116950	8813.95	1	1	207770	58814	67140	1	14744	1	8581.4	1	756440	36349	16953	289300	1	13302	1	1	20791	1	8162.79	39262	51786	69881	52786	1	15810	96071	174980	91024	1140000	42762	366760	1	1	13190	1	33405
HFD_Cyp2b-null	58	177	27.8	11.6	168	0.088451	34.03	114570	9804.35	66109	6217.39	1	1	150150	30783	43652	1	12826	1	4413.04	1	427110	22478	9543.48	181910	7891.3	6847.83	1	1	9913.04	1	4956.52	32911	35111	33000	28533	1	1	73689	130580	47533	1023900	25089	208130	1	1	1	1	29533
HFD_Cyp2b-null	45	189	30.3	9	182.3	0.084838	30.62	69520	29740	137040	11780	1	1	114160	41660	80820	1	9340	1	8160	1	574640	17860	11580	222140	1	12320	1	1	15000	1	1	31955	46159	71977	44545	1	12205	116180	213700	74932	1044300	29500	344660	26841	1	16545	1	36409
HFD_WT	66	169	24.7	13.2	155.9	0.050089	28.15	107310	12667	103460	8500	1	1	123980	37104	80167	1	11042	1	6291.67	1	583750	15396	10583	182150	1	11292	1	1	12021	1	1	25283	32543	89413	23239	1	1	63543	124870	27674	877930	18500	147980	14913	1	11761	1	25217
HFD_WT	69	195	33.4	13.9	173.1	0.069783	33.93	236910	44159	116110	10909	1	1	117500	44886	131500	1	11750	1	15500	1	857840	21955	18250	233340	1	14000	1	1	18136	1	1	23932	27955	69250	38500	1	1	72909	171590	50750	926140	24591	152230	10705	1	1	1	17000
HFD_WT	58	158	21.2	11.6	141.7	0.077304	25.67	86558	15000	106650	9488.37	1	1	128280	34326	153580	1	10814	1	9953.49	1	602070	20791	11209	157910	1	13326	1	1	12837	1	1	23453	13813	37016	17891	1	1	50219	127580	16344	494110	12719	56719	5468.75	1	1	1	16734
Old_Cyp2b-null	153.24	144.52	57.0862	30.65	77.35	0.07	52	112960	63239	410520	30957	13152	9108.7	192220	119200	63587	18978	1	39087	1	9304.35	466430	41478	16761	703850	10543	1	1	10500	12739	1	28739	121830	72667	248690	128360	36889	19944	230220	300140	60278	1030800	44611	234810	60278	14472	1	32333	69111
Old_Cyp2b-null	113.882	144.52	57.0862	22.7775	83.37	0.06534	40.71	245980	67140	263260	37302	1	10395	215860	86651	133650	1	19814	13116	1	1	503370	38186	12721	661530	7906.98	1	1	8651.16	10512	66442	23349	52385	78256	235360	196050	74692	28462	165590	134560	68462	680540	29308	590740	56692	9051.28	8769.23	10231	41769
Old_Cyp2b-null	122.78	144.52	57.0862	24.56	71.31	0.063733	37.5	93114	42364	177180	16273	19045	1	262820	168800	122450	1	15591	18091	1	9886.36	847340	46841	19909	555300	1	1	13909	1	23614	1	17545	40744	57718	74974	85000	1	25205	176510	292380	51051	817080	28692	446870	55615	10128	13590	16385	48026
Old_Cyp2b-null	90.6	146.26	56.2125	18.12	65.5	0.082271	48.62	83905	105900	250670	40286	1	10952	225170	129380	67238	17976	1	26929	1	1	453400	38286	13238	749740	9142.86	1	11905	1	7928.57	1	37738	45024	40073	199490	156020	22854	24171	168100	246120	85244	931930	29927	458660	51463	1	1	27805	49439
Old_Cyp2b-null	88.91	142.78	57.96	17.78	71.91	0.093603	45.5	187050	23114	154140	14364	15977	8545.45	204910	64045	70386	12659	1	26114	1	1	487230	28227	10545	679640	1	1	8250	1	11818	1	14273	45333	49556	112640	89806	11694	24639	143810	169560	33444	726640	23250	609810	43694	1	9972.22	22333	25111
Old_WT	42.13	75.92	21.9375	8.43	46.67	0.025441	34.59	362330	121950	473620	44974	21846	18795	392820	154230	208360	1	1	47462	1	17974	474590	44026	22897	721740	19564	1	22769	1	10462	96282	20872	119220	61528	185640	251140	57528	20833	190190	242390	93639	894470	30056	311890	32111	15444	1	19889	16611
Old_WT	76.33	114.2	31.1925	15.27	72.61	0.030506	32.78	354890	225260	506710	75895	17763	11842	419130	129240	332790	1	29921	49553	1	1	542920	47579	30105	866790	23368	10237	1	39211	11079	31289	26789	36514	54657	507490	172000	12000	25286	178800	256370	108690	874290	52371	247660	62371	17114	1	14857	16800
Old_WT	96.66	132.01	50.1225	19.33	65.18	0.0609	43.35	369290	165790	544740	52079	21868	11316	228180	112000	215370	12947	1	21053	1	1	444450	58105	12158	666760	14895	1	1	24474	7894.74	64947	26368	46167	46639	378890	171690	29806	18278	170190	180440	66333	921000	32806	346250	44556	16500	1	26444	39389
Old_WT	107.85	112.29	35.5125	21.57	64.94	0.04433	36.77	136140	83162	256840	30108	19189	1	293380	173860	130240	1	24757	25595	1	27405	622840	77757	27730	706620	16297	1	1	22568	16649	1	29135	61865	39432	275300	151320	15027	11189	231240	321620	59216	939570	44108	325240	34189	16919	1	12568	68162
Old_WT	55.9	105.58	33.24	11.18	61.26	0.036381	32.16	266900	113290	481640	80595	19286	12214	251500	107600	120450	1	1	43786	1	1	488520	54833	18952	724790	23786	9190.48	1	26548	9023.81	1	19214	58657	37543	263570	78229	28314	22829	177200	141000	61400	875540	47200	321540	32400	15429	1	20829	45714
Normalization of each sample’s data to 1 to determine the ratio of each lipid to the total was performed to make a PCA plot based on lipid ratios instead of total lipids.
[truncated: 32 more columns]

## Sheet: Suppl File 3
Suppl File 3a: Lipids that are statistically different by Student's t-tests between Cyp2b-null and WT mice in the different age and diet groups.
* indicates these lipids were not found predictive of differences by Random Forest.
Supplementary File 3b. Important or significantly perturbed phospholipid species in Cyp2b-null mice compared to WT mice identified by both random forest analysis and Student’s t-tests in young (4.5 mo) ND-fed, young (4.5 mo) HFD-fed, and old (9 mo) mice.
Young (4.5 mo) ND-fed WT vs Cyp2b-null					Young (4.5 mo) HFD-fed WT vs Cyp2b-null					Old (9 mo) ND-fed WT vs Cyp2b-null mice
Phospholipid species	Average increase/decrease in Cyp2b-null micea	P valueb			Phospholipid species	Average increase/decrease in Cyp2b-null micea	P valueb			Phospholipid species	Average increase/decrease in Cyp2b-null micea	P valueb
ARA_PtdCho(38:4)-CH3/Ptd2Gro(84:21)	-11892.5	0.00116457			ALA_LysoPtdEtn(18:3)	10486.7	0.00492523			LA_PtdSer(36:3)	-6429.32	0.00130944
LA_Ptd2Gro(64:5)	-219170	0.00132717			ARA	13465.3	0.0112631			ALA_LysoPtdSer(18:3)	-9550.94	0.00990141
LA_lysoPtdCho(18:2)	-17880.2	0.00355553			ARA_PtdIns(38:4)	187540	0.017041			ARA_PtdCho(40:4)-CH3	-201556	0.0112613
ALA_lysoPtdCho(18:3)	-20058.7	0.00365113			ARA_PtdCho(38:4)-CH3/PtdCho(84:21)	-85800.3	0.0328494			LA_LysoPtdCho(18:2)	-81539	0.0175828
LA_PtdIns(3,4,5)P3(38:2)	58539.7	0.00687206			DHA_PtdCho(40:6)	-1064.5	0.0408118			LA_LysoPtdEtn(18:2)	-153308	0.0204946
ARA_PtdOH(38:4)/Ptd2Gro(72:8)	-13097.4	0.0197325			a All values are in area.					LA	2082.27	0.0224347
ALA_LysoPtdEtn(18:3)	16168.3	0.0216705			b P values are determined by Student’s t-test.					LA_PtdGro(38:3)/Ptd2Gro(84:17)	-8955.54	0.0244729
ARA_PtdSer(38:4)/Ptd2Gro(84:5)	-521293	0.0232004								ALA_PtdEtn(20:3)/PtdCho(36:5)	-17856.4	0.0255878
LA_PtdCho(34:2)-CH3/PtdEtn(36:2)	-255410	0.0300016								LA_Ptd2Gro(70:3)/PtdEtn(34:2)/PtdCho(32:2)-CH3	-28893.8	0.0279098
LA_PtdCho(36:2)-CH3/PtdGro(36:3)	-97134	0.0335566								LA_PtdIns(3,4,5)P3(38:2)	-10355.6	0.0291875
LA_Ptd2Gro(70:3)/PtdEtn(34:2)/PtdCho(32:2)-CH3	-145950	0.0391075								LA_Ptd2Gro(64:5)	-96806	0.0362538
LA_PtdOH(36:4)	-25630.6	0.0418134								LA_PtdOH(36:4)	-2124.79	0.04133
LA_PtdOH(40:4)	-4273.33	0.0464913								ALA_LysoPtdCho(18:3)	-13231.6	0.042274
DHA	-16946.3	0.0491137								ARA_PtdIns(34:4)/Ptd2Gro(88:17)	157662	0.0469872
a All values are in area.										a All values are in area.
b P values are determined by Student’s t-test.										b P values are determined by Student’s t-test.

## Sheet: Suppl File 4
Supplementary File 4. Important perturbed hepatic phospholipid species in Cyp2b-null mice within each group.
Venn diagram of important lipid species between Cyp2b-null and WT mice of each featured group based on random forest analysis (MDA > 0).

## Sheet: Suppl File 5
Supplementary File 5a. Data used to make principal component analysis (PCA) biplot for Figure 5b.
Group	TAG	CHOL	LDL	VLDL	HDL	WSI	Weight	LA	LA_LysoPtdEtn(18:2)	LA_LysoPtdCho(18:2)	LA_PtdIns(3,4,5)P3(38:2)	LA_Ptd2Gro(64:5)	LA_PtdEtn(32:2)/PtdCho(30:2)-CH3	LA_PtdOH(36:4)	LA_Ptd2Gro(70:3)/PtdEtn(34:2)/PtdCho(32:2)-CH3	LA_PtdOH(38:2)	LA_PtdCho(34:2)-CH3/PtdEtn(36:2)	LA_PtdOH(40:4)	LA_PtdCho(36:2)-CH3/PtdGro(36:3)	LA_PtdSer(36:3)	LA_PtdGro(38:3)/Ptd2Gro(84:17)	ARA	ARA_LysoPtdOH(20:4)	ARA_LysoPtdCho(20:4)	ARA_LysoPtdEtn(20:4)	ARA_PtdOH(36:4)	ARA_PtdOH(38:4)/Ptd2Gro(72:8)	ARA_PtdEtn(36:4)	ARA_PtdEtn(37:5)/PtdOH(40:4)	ARA_PtdCho(36:4)-CH3/Ptd2Gro(78:7)	ARA_PtdCho(38:4)-CH3/Ptd2Gro(84:21)	ARA_PtdCho(40:4)-CH3	ARA_PtdSer(36:4)	ARA_PtdSer(38:4)/Ptd2Gro(84:5)	ARA_PtdIns(34:4)/Ptd2Gro(88:17)	ARA_PtdIns(38:4)	DHA	DHA_LysoPtdEtn(22:6)	DHA_PtdOH(40:6)	DHA_PtdEtn(38:6)/Ptd2Gro(78:11)	DHA_PtdSer(38:6)/Ptd2Gro(84:11)	DHA_PtdCho(40:6)-CH3/PtdEtn(42:6)	DHA_PtdSer(40:6)/Ptd2Gro(88:9)	DHA_PtdEtn(44:8)	DHA_PtdIns(37:7)	DHA_PtdIns(41:6)	ALA_LysoPtdEtn(18:3)	ALA_LysoPtdCho(18:3)	ALA_PtdEtn(20:3)/PtdCho(36:5)
Young_Cyp2b-null	73	135	19.2	14.5	122.8	0.027056	27.72	34623	8716.98	43906	1	1	1	48623	52434	1	283340	8245.28	80491	1	1	71592	37918	137730	168690	15204	150510	158630	53408	784160	540710	1	34041	38306	9367.35	1	17014	10707	16959	142650	6258.5	55422	6612.24	1	3489.8	4306.12	9015.79	7310.53	7073.68
Young_Cyp2b-null	67	130	18	13.5	124.2	0.038476	26.77	37429	10286	41755	1	1	1	44408	55898	4326.53	312570	8653.06	90408	1	1	82919	43486	115810	202760	15216	187730	197620	161380	1053800	559380	1	62108	45784	27216	1	14589	4668.71	16448	87994	8055.21	46865	4509.2	7993.86	18160	2171.78	8788.89	11861	5555.56
Young_Cyp2b-null	59	117	16.8	11.7	112.1	0.024701	25.1	83565	21543	46130	1	1	1	136850	95826	1	741460	22870	225760	1	1	36154	46615	54179	55462	16821	180770	189870	97974	1165500	548690	1	39205	49077	17795	31410	15090	3771.08	16331	86464	7192.77	72024	4036.14	4632.53	1	1	12780	14305	6000
Young_WT	101	102	10.8	20.2	92.5	0.02011	27.35	104020	59705	202090	13636	9636.36	1	148910	130000	1	871550	27409	317860	1	1	28366	36537	55293	90098	14707	125200	244340	33707	972070	238800	1	25439	24683	13707	28854	19881	6107.14	12524	67036	5517.86	47643	2035.71	3136.9	1	3369.05	28788	26889	6592.59
Young_WT	98	100	9.4	19.6	91.5	0.013823	27.49	185780	144880	325530	27150	14700	11000	282430	142900	21200	966400	53275	518030	1	1	43846	41897	56154	116950	14538	124850	156030	86205	872380	344380	1	40154	34615	12282	31333	22135	16526	20141	72237	7288.46	57212	6730.77	1	12468	1	17252	27000	11110
Young_WT	69	109	12.9	13.7	101.1	0.026427	28.38	100440	50415	261680	19390	11341	1	236390	222660	1	1063300	35976	327000	1	1	45182	49568	50886	172570	14636	93341	223680	44682	814480	263950	1	36000	25364	10159	17000	17497	8298.14	16124	117570	8739.13	31503	4434.78	1	14820	2180.12	23837	33228	1
HFD_Cyp2b-null	49	189	34.6	9.9	165.1	0.075243	32.96	154840	27814	116950	8813.95	1	1	207770	67140	1	756440	36349	289300	1	1	39262	51786	52786	69881	15810	96071	174980	91024	1140000	366760	1	42762	1	13190	33405	12773	2185.57	8335.05	41979	5407.22	22521	1134.02	1	1283.51	1257.73	4359.55	7488.76	4421.35
HFD_Cyp2b-null	58	177	27.8	11.6	168	0.088451	34.03	114570	9804.35	66109	6217.39	1	1	150150	43652	1	427110	22478	181910	7891.3	1	32911	35111	28533	33000	1	73689	130580	47533	1023900	208130	1	25089	1	1	29533	11820	1335	6685	53270	4980	32990	920	2705	2375	1825	4740.54	6151.35	2210.81
HFD_Cyp2b-null	45	189	30.3	9	182.3	0.084838	30.62	69520	29740	137040	11780	1	1	114160	80820	1	574640	17860	222140	1	1	31955	46159	44545	71977	12205	116180	213700	74932	1044300	344660	1	29500	26841	16545	36409	17923	3628.42	8103.83	108230	5267.76	49781	1967.21	4715.85	1	2464.48	4256.54	6141.36	1738.22
HFD_WT	66	169	24.7	13.2	155.9	0.050089	28.15	107310	12667	103460	8500	1	1	123980	80167	1	583750	15396	182150	1	1	25283	32543	23239	89413	1	63543	124870	27674	877930	147980	1	18500	14913	11761	25217	14851	4141.89	13270	133340	7986.49	33919	1993.24	2263.51	5020.27	3736.49	7247.06	7088.24	3711.76
HFD_WT	69	195	33.4	13.9	173.1	0.069783	33.93	236910	44159	116110	10909	1	1	117500	131500	1	857840	21955	233340	1	1	23932	27955	38500	69250	1	72909	171590	50750	926140	152230	1	24591	10705	1	17000	14217	3769.23	13301	193130	5510.49	44748	2762.24	1	6090.91	2573.43	8887.18	8174.36	3994.87
HFD_WT	58	158	21.2	11.6	141.7	0.077304	25.67	86558	15000	106650	9488.37	1	1	128280	153580	1	602070	20791	157910	1	1	23453	13813	17891	37016	1	50219	127580	16344	494110	56719	1	12719	5468.75	1	16734	10970	3111.11	9296.3	134410	3407.41	32504	2459.26	3718.52	2192.59	3111.11	9719.63	11981	3355.14
Old_Cyp2b-null	153.24	144.52	57.0862	30.65	77.35	0.07	52	112960	63239	410520	30957	13152	9108.7	192220	63587	39087	466430	41478	703850	10543	10500	121830	72667	128360	248690	19944	230220	300140	60278	1030800	234810	14472	44611	60278	1	69111	15017	19909	29198	294020	1	41017	9652.89	1	36025	3925.62	9262.3	7598.36	3090.16
Old_Cyp2b-null	113.882	144.52	57.0862	22.7775	83.37	0.06534	40.71	245980	67140	263260	37302	1	10395	215860	133650	13116	503370	38186	661530	7906.98	8651.16	52385	78256	196050	235360	28462	165590	134560	68462	680540	590740	9051.28	29308	56692	8769.23	41769	16215	13692	29822	229300	1	61514	8663.55	10402	22888	7140.19	9330.51	8881.36	5855.93
Old_Cyp2b-null	122.78	144.52	57.0862	24.56	71.31	0.063733	37.5	93114	42364	177180	16273	19045	1	262820	122450	18091	847340	46841	555300	1	1	40744	57718	85000	74974	25205	176510	292380	51051	817080	446870	10128	28692	55615	13590	48026	14176	11019	44306	175330	8935.19	56704	8314.81	4305.56	7407.41	5666.67	8075	9341.67	3633.33
Old_Cyp2b-null	90.6	146.26	56.2125	18.12	65.5	0.082271	48.62	83905	105900	250670	40286	1	10952	225170	67238	26929	453400	38286	749740	9142.86	1	45024	40073	156020	199490	24171	168100	246120	85244	931930	458660	1	29927	51463	1	49439	11632	6940.17	38940	205680	9324.79	40846	12385	3196.58	28265	7615.38	5253.97	8285.71	6793.65
Old_Cyp2b-null	88.91	142.78	57.96	17.78	71.91	0.093603	45.5	187050	23114	154140	14364	15977	8545.45	204910	70386	26114	487230	28227	679640	1	1	45333	49556	89806	112640	24639	143810	169560	33444	726640	609810	1	23250	43694	9972.22	25111	16780	7917.43	29037	224840	1	37303	10330	6155.96	28633	5036.7	6820.31	7984.38	2257.81
Old_WT	42.13	75.92	21.9375	8.43	46.67	0.025441	34.59	362330	121950	473620	44974	21846	18795	392820	208360	47462	474590	44026	721740	19564	1	119220	61528	251140	185640	20833	190190	242390	93639	894470	311890	15444	30056	32111	1	16611	19380	15090	32640	225180	3990	61720	10050	11540	62610	4480	8708.66	7472.44	13102
Old_WT	76.33	114.2	31.1925	15.27	72.61	0.030506	32.78	354890	225260	506710	75895	17763	11842	419130	332790	49553	542920	47579	866790	23368	39211	36514	54657	172000	507490	25286	178800	256370	108690	874290	247660	17114	52371	62371	1	16800	16280	26548	31613	260990	1	59699	10086	14344	80161	4021.51	14305	11172	21078
Old_WT	96.66	132.01	50.1225	19.33	65.18	0.0609	43.35	369290	165790	544740	52079	21868	11316	228180	215370	21053	444450	58105	666760	14895	24474	46167	46639	171690	378890	18278	170190	180440	66333	921000	346250	16500	32806	44556	1	39389	13980	31584	27109	326550	1	62287	12564	1	49604	4207.92	19656	12408	4440
Old_WT	107.85	112.29	35.5125	21.57	64.94	0.04433	36.77	136140	83162	256840	30108	19189	1	293380	130240	25595	622840	77757	706620	16297	22568	61865	39432	151320	275300	11189	231240	321620	59216	939570	325240	16919	44108	34189	1	68162	22069	32874	39460	118330	1	73092	7689.66	3620.69	70218	2850.57	13333	11040	8428.57
Old_WT	55.9	105.58	33.24	11.18	61.26	0.036381	32.16	266900	113290	481640	80595	19286	12214	251500	120450	43786	488520	54833	724790	23786	26548	58657	37543	78229	263570	22829	177200	141000	61400	875540	321540	15429	47200	32400	1	45714	11678	2049.59	19066	174740	5933.88	43479	3297.52	1	1	3413.22	14886	10623	19360
Supplementary File 5b. Top 10 contributing variables of PCA plots in Fig. 5b. Bar graphs of top 10 measured variables from principle components 1, 2, or 3 of PCA plots from Fig. 4 (a) and Fig. 5 (b+A28) based on loading strength expressed in percent contribution. The factoextra R package (https://cran.r-project.org) was used to obtain the percent contributions of each measured variable in princip…
[truncated: 11 more columns]
